# Supplementary material for: No Indices of Increased Type 2 Diabetes Risk in Individuals with Reactive Postprandial Hypoglycemia
Source: MDPI journal article supplement (doi:10.3390/metabo12121232), 2022-12-08
Supplement: s1 [file s1]

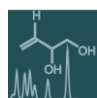

**Supplementary Table S1.** Pharmacotherapy of comorbidities in RPH participants ( $n = 29$ ).

| Class of medication                   | $n$ (%) |
|---------------------------------------|---------|
| Proton pump inhibitors                | 5 (17)  |
| Antidepressant/antipsychotics         | 5 (17)  |
| Thyroid substitution (levothyroxine)  | 4 (13)  |
| Bronchodilator                        | 2 (7)   |
| ACE inhibitor/calcium channel blocker | 2 (7%)  |
| Statin                                | 2 (7%)  |
| Beta receptor blocker                 | 1 (3%)  |
| Methotrexate                          | 1 (3%)  |

LEGEND: ACE, angiotensin-converting enzyme.

**Supplementary Table S2.** Blood glucose, insulin, and C-peptide concentration during 5-h OGTT in individuals with RPH at baseline and at follow-up.

| Time (min) | Glucose (mmol/L) |                                   |                                   |               | Insulin (mU/L) |                 |                 |            | C-peptide (nmol/L) |               |               |            |
|------------|------------------|-----------------------------------|-----------------------------------|---------------|----------------|-----------------|-----------------|------------|--------------------|---------------|---------------|------------|
|            | 1.               | Visit Up                          | Follow                            | $p$ -Value    | 1.             | Visit Up        | Follow          | $p$ -Value | 1.                 | Visit Up      | Follow        | $p$ -Value |
| <b>0</b>   |                  | $4.9 \pm 0.5$                     | $4.7 \pm 0.7$                     | 0.121         |                | $4.5 \pm 3.2$   | $4.4 \pm 4.2$   | 0.977      |                    | $0.5 \pm 0.1$ | $0.5 \pm 0.2$ | 0.756      |
| <b>30</b>  |                  | $7.2 \pm 1.5$                     | $7.1 \pm 2.0$                     | 0.822         |                | $39.7 \pm 22.9$ | $43.0 \pm 17.6$ | 0.614      |                    | $2.0 \pm 0.7$ | $2.2 \pm 0.6$ | 0.262      |
| <b>60</b>  |                  | $6.7 \pm 2.5$                     | $6.5 \pm 2.5$                     | 0.581         |                | $64.6 \pm 30.5$ | $52.6 \pm 18.5$ | 0.149      |                    | $3.1 \pm 0.9$ | $2.9 \pm 0.7$ | 0.312      |
| <b>120</b> |                  | $5.0 \pm 1.6$                     | $4.9 \pm 1.7$                     | 0.847         |                | $47.4 \pm 49.0$ | $43.7 \pm 26.0$ | 0.743      |                    | $2.6 \pm 1.3$ | $2.6 \pm 1.0$ | 0.978      |
| <b>180</b> |                  | $3.6 \pm 1.1$                     | $3.3 \pm 0.9$                     | 0.174         |                | $14.8 \pm 14.0$ | $13.5 \pm 11.2$ | 0.633      |                    | $1.2 \pm 0.8$ | $1.1 \pm 0.7$ | 0.364      |
| <b>240</b> |                  | <b><math>4.2 \pm 0.5^*</math></b> | <b><math>3.7 \pm 0.7^*</math></b> | <b>0.007*</b> |                | $5.5 \pm 5.5$   | $5.8 \pm 5.1$   | 0.833      |                    | $0.5 \pm 0.3$ | $0.5 \pm 0.2$ | 0.841      |
| <b>300</b> |                  | <b><math>4.7 \pm 0.3^*</math></b> | <b><math>4.0 \pm 0.6^*</math></b> | <b>0.000*</b> |                | $4.2 \pm 4.0$   | $3.7 \pm 3.0$   | 0.682      |                    | $0.4 \pm 0.2$ | $0.4 \pm 0.2$ | 0.904      |

Means  $\pm$  standard deviations are presented. Statistically significant values are presented in bold with an asterisk.

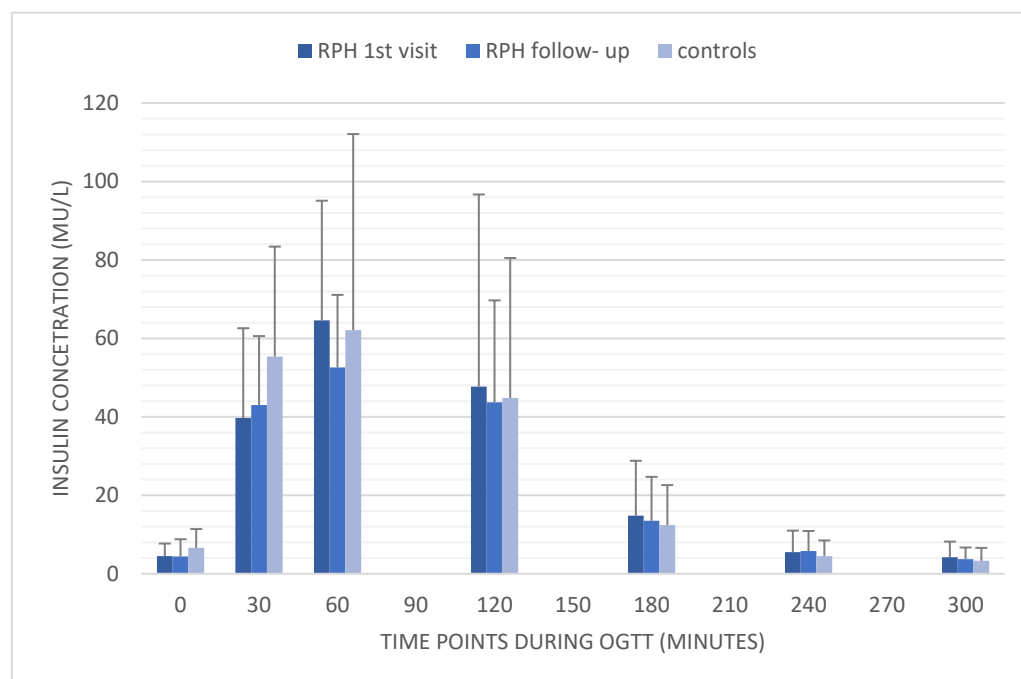

**Supplementary Figure S1. Comparison of insulin concentration in subjects with RPH at baseline and follow-up vs. the healthy control group, showing no difference in any time point during 5-h OGTT.**

Legend: RPH: reactive postprandial hypoglycemia, OGTT: oral glucose tolerance test.
